# Supplementary material
Source: PubMed Central journal article supplement (PMC3037568)
Supplement: mmc1.pdf [file mmc1.pdf]

SUPPORTING MATERIAL

Figure S1

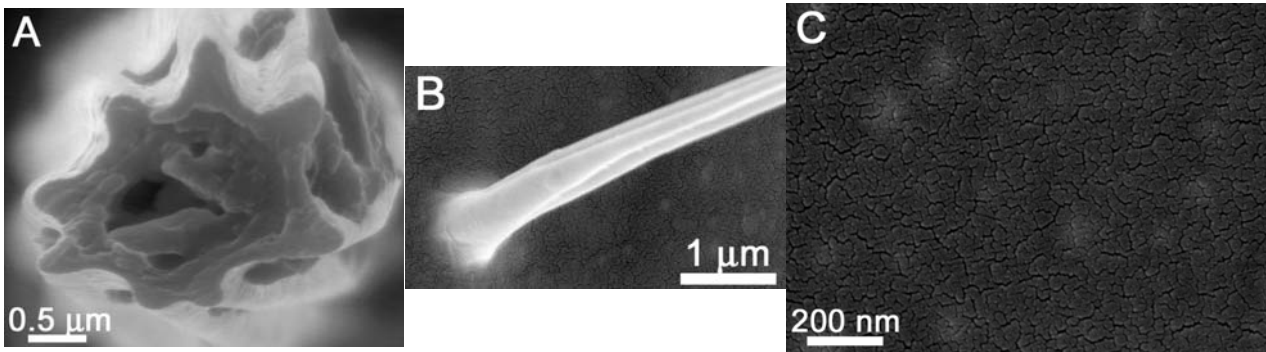

**Figure S1.** SEM images of: (A) a cross-section of a *macrotrichia* obtained near the midpoint of the hair length; (B) channels running along the long axis of the *microtrichia* shaft, and (C) the underlying wing cuticle surface.

Figure S2

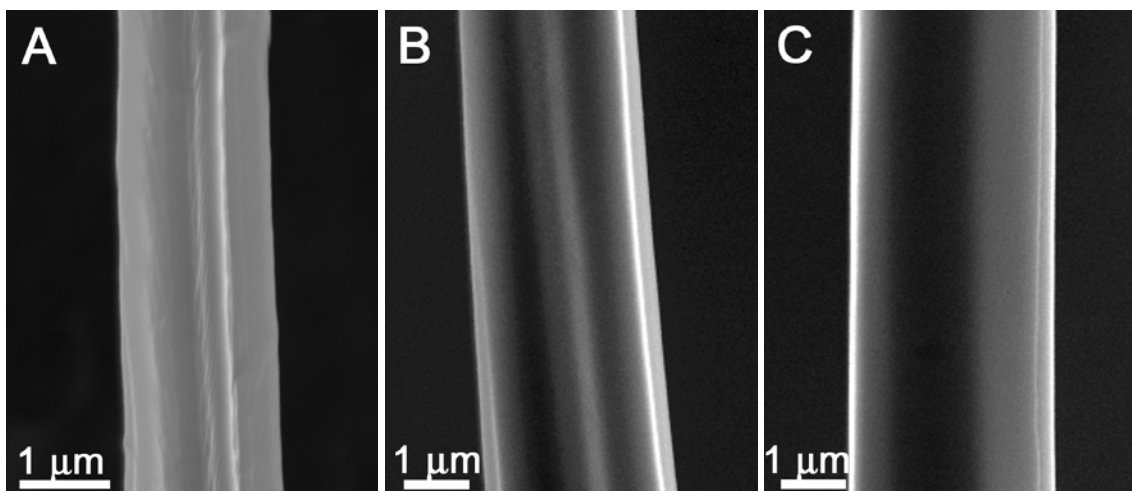

**Figure S2.** SEM images of: (A) a single uncoated hair of the *Micromus tasmaniae* wing. The nano-channels extending along the long axis are clearly visible. (B) High resolution SEM image of the macrotrichia shaft after a thin coat of PDMS polymer has been applied. A significant amount of the original topography (channels) remains visible on the hair shaft. (C) SEM image of a macrotrichia shaft after a thick application of PDMS polymer coating. None of the original channel topography is evident.

**Figure S3**

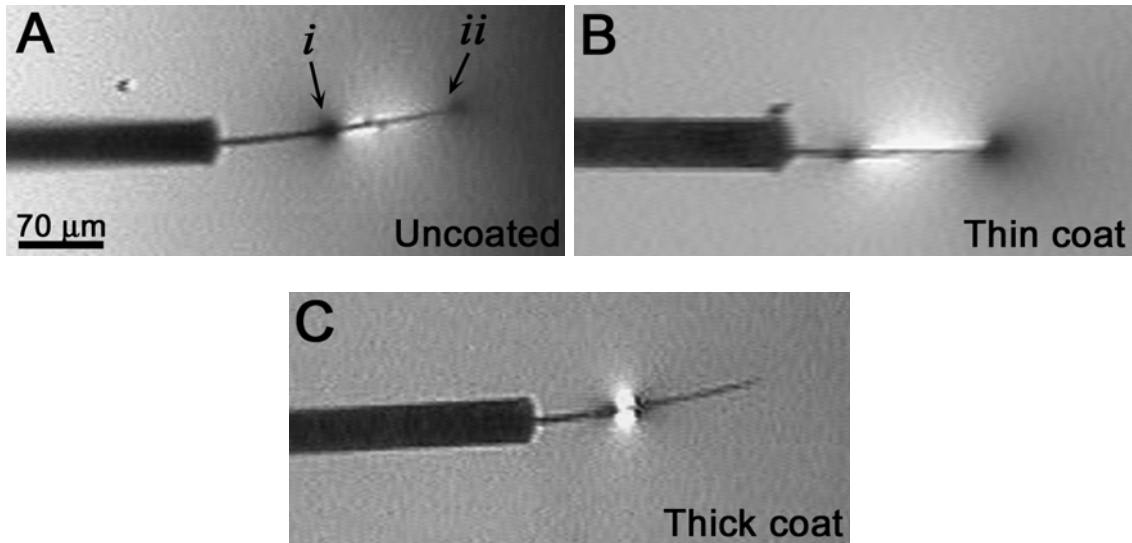

**Figure S3.** Optical images showing the response of individual uncoated (A), thin (B) and thick (C) PDMS coated lacewing hair coming into contact with a 0.001 M SDS solution. Both (A) and (B) do not penetrate the surface as observed by the formation of a dimple on the surface of the droplet from point *i* to *ii*. The fully coated macrotrichia (C) which has its channel topography removed shows penetration into the solution and demonstrates there is a reduced efficiency in repelling water for hairs without the channels.

**Figure S4**

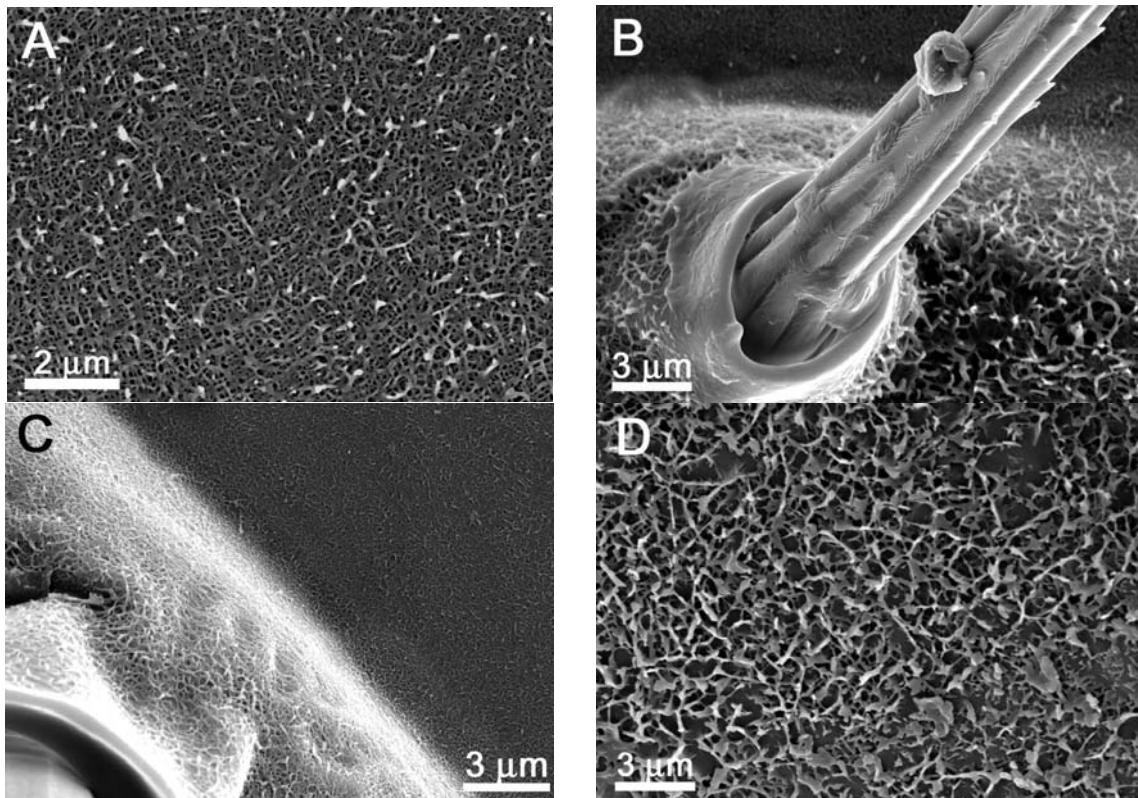

**Figure S4.** SEM images of four different lacewing species revealing the fine wing membrane structure. (A) *Italochrysa insignis*, (B) *Chrysopa oculata*, (C) *Oligochrysa lutea*, and (D) *Glenoleon pulchellus*.
